# Supplementary material
Source: PubMed Central journal article supplement (PMC9856823)
Supplement: jama-e2223550-s003.pdf [file jama-e2223550-s003.pdf]

## Supplemental Online Content: Nonauthor Collaborators

\*First name, last name, and suffix (if applicable) are required and will appear in PubMed.

| <b>Société Française d'Anesthésie Réanimation (SFAR) Research Network and Atlanrea Study Group</b> |                      |                              |                         |                                                                                   |                                                 |                                                                |                                                                                                   |
|----------------------------------------------------------------------------------------------------|----------------------|------------------------------|-------------------------|-----------------------------------------------------------------------------------|-------------------------------------------------|----------------------------------------------------------------|---------------------------------------------------------------------------------------------------|
| <b>*First Name and Middle Initial(s)</b>                                                           | <b>*Last Name</b>    | <b>*Suffix (eg, Jr, III)</b> | <b>Academic Degrees</b> | <b>Institution</b>                                                                | <b>Location (city, state/province, country)</b> | <b>Role or Contribution, eg, chair, principal investigator</b> | <b>Group (if more than 1 Group listed in the byline) and/or Subgroup (eg, Steering Committee)</b> |
| Pascal                                                                                             | Incagnoli            |                              | MD, PhD                 | Hospices Civils de Lyon, Groupe Hospitalier Sud, Service d'Anesthésie Réanimation | Pierre Bénite, France                           | Sub Investigator                                               | Société Française d'Anesthésie Réanimation (SFAR) Research Network.                               |
| Anne                                                                                               | Li                   |                              | MD                      | Hospices Civils de Lyon, Groupe Hospitalier Sud, Service d'Anesthésie Réanimation | Pierre Bénite, France                           | Sub Investigator                                               | Société Française d'Anesthésie Réanimation (SFAR) Research Network.                               |
| Xavier                                                                                             | PICHON               |                              | MD                      | CHU Toulouse, Pôle Anesthésie Réanimation                                         | Toulouse, France                                | Sub Investigator                                               | Société Française d'Anesthésie Réanimation (SFAR) Research Network.                               |
| Amazigh                                                                                            | AGUERSIF             |                              | MD                      | CHU Toulouse, Pôle Anesthésie Réanimation                                         | Toulouse, France                                | Sub Investigator                                               | Société Française d'Anesthésie Réanimation (SFAR) Research Network.                               |
| Vincent                                                                                            | MINVILLE             |                              | MD, PhD                 | CHU Toulouse, Pôle Anesthésie Réanimation                                         | Toulouse, France                                | Sub Investigator                                               | Société Française d'Anesthésie Réanimation (SFAR) Research Network.                               |
| Martin                                                                                             | DUPUIS               |                              | MD                      | CHU GRENOBLE ALPES                                                                | Grenoble, France                                | Sub Investigator                                               | Société Française d'Anesthésie Réanimation (SFAR) Research Network.                               |
| Matthias                                                                                           | Garot                |                              | MD                      | CHU Lille, Pôle Anesthésie Réanimation                                            | Lille, france                                   | Sub Investigator                                               | Société Française d'Anesthésie Réanimation (SFAR) Research Network.                               |
| Florence                                                                                           | Lallemant            |                              | MD                      | Service d'Anesthésie Réanimation, CHRU Lille, Hôpital Salengro                    | Lille, france                                   | Sub Investigator                                               | Société Française d'Anesthésie Réanimation (SFAR) Research Network.                               |
| Christine                                                                                          | Ducam                |                              | MD                      | Service d'Anesthésie Réanimation, CHRU Lille, Hôpital Salengro                    | Lille, france                                   | Sub Investigator                                               | Société Française d'Anesthésie Réanimation (SFAR) Research Network.                               |
| Aurélien                                                                                           | Rohn                 |                              | MD                      | Service d'Anesthésie Réanimation, CHRU Lille, Hôpital Salengro                    | Lille, france                                   | Sub Investigator                                               | Société Française d'Anesthésie Réanimation (SFAR) Research Network.                               |
| Alexis                                                                                             | Duchalais            |                              | MD                      | CHD Vendée                                                                        | La Roche sur Yon, France                        | sub investigator                                               | Société Française d'Anesthésie Réanimation (SFAR) Research Network.                               |
| Clément                                                                                            | Starck               |                              | MD                      | Service d'Anesthésie Réanimation, CHRU Brest                                      | Brest, France                                   | Sub Investigator                                               | Atlanrea study group                                                                              |
| Maxime                                                                                             | Lecourtois Du Manoir |                              | MD                      | Service d'Anesthésie Réanimation, CHU Nantes                                      | Nantes, France                                  | Sub Investigator                                               | Atlanrea study group                                                                              |
| Paul                                                                                               | Rooze                |                              | MD                      | Service d'Anesthésie Réanimation, CHU Nantes                                      | Nantes, France                                  | Sub Investigator                                               | Atlanrea study group                                                                              |
| Amelie                                                                                             | Trichot              |                              | MD                      | Service d'Anesthésie Réanimation, CHU Nantes                                      | Nantes, France                                  | Sub Investigator                                               | Atlanrea study group                                                                              |
| Romain                                                                                             | Deransy              |                              | MD                      | Service d'Anesthésie Réanimation, CHU Nantes                                      | Nantes, France                                  | Sub Investigator                                               | Atlanrea study group                                                                              |
| Benoit                                                                                             | Plaud                |                              | MD                      | AP/HP France                                                                      | Paris, France                                   | DSMB member                                                    | Société Française d'Anesthésie Réanimation (SFAR) Research Network.                               |

## Supplemental Online Content: Nonauthor Collaborators

\*First name, last name, and suffix (if applicable) are required and will appear in PubMed.

| *First Name and Middle Initial(s) | *Last Name | *Suffix (eg, Jr, III) | Academic Degrees | Institution                                    | Location (city, state/province, country) | Role or Contribution, eg, chair, principal investigator | Group (if more than 1 Group listed in the byline) and/or Subgroup (eg, Steering Committee) |
|-----------------------------------|------------|-----------------------|------------------|------------------------------------------------|------------------------------------------|---------------------------------------------------------|--------------------------------------------------------------------------------------------|
| Denis                             | Frasca     |                       | MD               | Service d'Anesthésie Réanimation, CHU Poitiers | Poitiers                                 | DSMB member                                             | Société Française d'Anesthésie Réanimation (SFAR) Research Network.                        |
| Laura                             | Leo        |                       | PhD              | Universite de Grenbole                         | Grenoble, France                         | DSMB member                                             | Société Française d'Anesthésie Réanimation (SFAR) Research Network.                        |
