# Supplementary material
Source: PubMed Central journal article supplement (PMC9856823)
Supplement: jama-e2223550-s004.pdf [file jama-e2223550-s004.pdf]

Grillot N, Lebuffe G, Huet O, et al; Atlanrea Study Group; Société Française d'Anesthésie Réanimation (SFAR) Research Group. Effect of remifentanyl vs neuromuscular blockers during rapid sequence intubation on successful intubation without major complications among patients at risk of aspiration: a randomized clinical trial. *JAMA*. Published January 3, 2023. doi:10.1001/jama.2022.23550

## Data Sharing Statement

### Data

**Data available:** Yes

**Data types:** Deidentified participant data

**How to access data:** Patient-level data and full dataset and statistical code will be available upon reasonable request to the corresponding author (Email: antoine.roquilly@chu-nantes.fr). Consent was not obtained, but the presented data are anonymized, and the risk of identification is low. The potential benefits of sharing these data outweigh the potential harm.

**When available:** With publication

### Supporting Documents

**Document types:** Statistical/analytic code, Informed consent form

**How to access documents:** Statistical/analytic code and informed consent form can be requested to the corresponding author (Email antoine.roquilly@chu-nantes.fr)

**When available:** With publication

### Additional Information

**Who can access the data:** researchers whose proposed use of the data has been approved

**Types of analyses:** Data will be available for purposes directly related to the study subject area

**Mechanisms of data availability:** Data will be made available with investigator support after approval of a proposal and a signed data access agreement.
